# Supplementary material for: Electrochemical determination of tert-butylhydroquinone by ZIF-67@TiO2 derived hierarchical TiO2/Co/NCNTs
Source: Royal Society of Chemistry journal article supplement (doi:10.1039/d3nj02149a), 2023-01-01
Supplement: d3nj02149a1.pdf [file d3nj02149a1.pdf]

## Supporting information

### Electrochemical determination of tert-butylhydroquinone by ZIF-67@TiO<sub>2</sub> derived hierarchical TiO<sub>2</sub>/Co/NCNTs

Shengbiao Zheng<sup>a,b</sup>, Jialong Fan<sup>a</sup>, Feilong Yin<sup>a</sup>, Jie Chen<sup>a,b</sup>, Zhenzhen Hui<sup>a,b</sup>, Jing Tang<sup>a,b\*</sup>, Xuchun Wang<sup>a,b</sup>, Jiahao Guo<sup>a,b\*</sup>

a College of Chemistry and Material Engineering, Anhui Science and Technology University, 233030, Bengbu, Anhui Province, China

b Anhui Province Quartz Sand Purification and Photovoltaic Glass Engineering Research Center, 233030, Bengbu, Anhui Province, China

\*Corresponding author. Tel.: +86 552 3197361

E-mail address: [zhengtang102@163.com](mailto:zhengtang102@163.com) (Tang Jing), [guojiahao1974@163.com](mailto:guojiahao1974@163.com) (Guo Jiahao)

Complete postal address: College of Chemistry and Material Engineering, Anhui Science and Technology University, 1501 Huangshan Road, Bengbu, Anhui Province, 233030, China

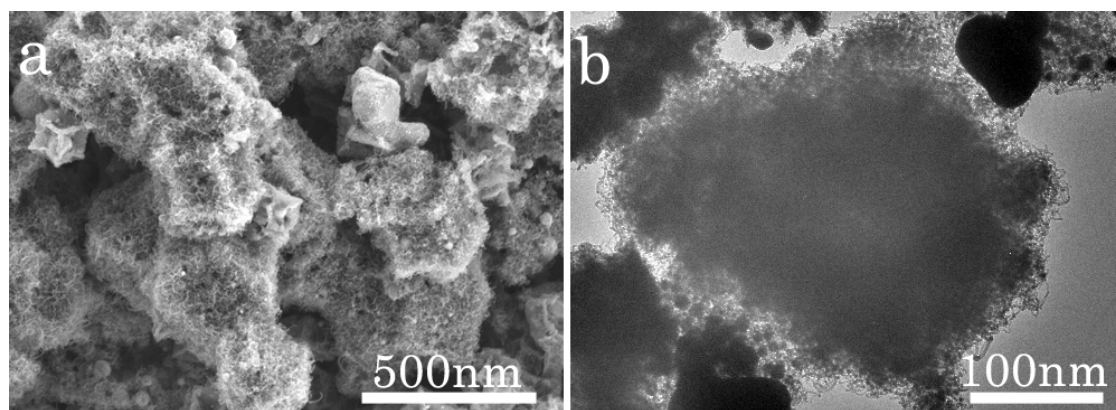

Fig. S1 SEM image (a) and (b) TEM image of Co/NCNTs composites
